# Supplementary material
Source: PubMed Central journal article supplement (PMC2727411)
Supplement: blood-2008-11-191445_1.pdf [file blood-2008-11-191445_1.pdf]

**Supplemental Table 1: Reported values of tissue stiffness**

| Tissue type                                       | Young's modulus, kPa                                | Citation                               | Method             |
|---------------------------------------------------|-----------------------------------------------------|----------------------------------------|--------------------|
| Bovine aortic endothelial cells                   | .1-2                                                | Sato <i>et al.</i> <sup>1</sup>        | AFM                |
| Rabbit cardiac cells                              | 100.3 ± 10.7                                        | Mathur <i>et al.</i> <sup>2</sup>      | AFM                |
| Murine skeletal muscle cells                      | 24.7 ± 3.5                                          | Mathur <i>et al.</i> <sup>2</sup>      | AFM                |
| Human umbilical vein endothelial cells            | 1.4-6.8                                             | Mathur <i>et al.</i> <sup>2</sup>      | AFM                |
| Human umbilical vein endothelial cells            | 2.7-7.2                                             | Kataoka <i>et al.</i> <sup>3</sup>     | AFM                |
| Human breast tissue                               | 15-30                                               | Van Houtten <i>et al.</i> <sup>4</sup> | MRE                |
| Human breast tissue                               | 5-25*<br>(healthy tissue)<br>60-100*<br>(carcinoma) | McKnight <i>et al.</i> <sup>5</sup>    | MRE                |
| Human skeletal muscle                             | 10-75*                                              | Uffmann <i>et al.</i> <sup>6</sup>     | MRE                |
| Atherosclerotic lesions of rabbit thoracic aortas | 10-100 <sup>†</sup>                                 | Matsumoto <i>et al.</i> <sup>7</sup>   | Pipette aspiration |
| Porcine liver                                     | 12.88 ± 2.53                                        | Tay <i>et al.</i> <sup>8</sup>         | Indentation        |

AFM: Atomic Force Microscopy; MRE: Magnetic Resonance Elastography

\*Values were reported as shear modulus (G), which is related to the Young's Modulus (E) by  $E=3G$ , for a poisson ratio of 0.5.

<sup>†</sup>Values have been adjusted by a correction factor of approximately 2-3 required for this technique<sup>9</sup>.

1. Sato M, Suzuki K, Ueki Y, Ohashi T. Microelastic mapping of living endothelial cells exposed to shear stress in relation to three-dimensional distribution of actin filaments. *Acta Biomater.* 2007;3:311-319.
2. Mathur AB, Collinsworth AM, Reichert WM, Kraus WE, Truskey GA. Endothelial, cardiac muscle and skeletal muscle exhibit different viscous and elastic properties as determined by atomic force microscopy. *J Biomech.* 2001;34:1545-1553.
3. Kataoka N, Iwaki K, Hashimoto K, et al. Measurements of endothelial cell-to-cell and cell-to-substrate gaps and micromechanical properties of endothelial cells during monocyte adhesion. *Proc Natl Acad Sci USA.* 2002;99:15638-15643.
4. Van Houten EE, Doyley MM, Kennedy FE, Weaver JB, Paulsen KD. Initial in vivo experience with steady-state subzone-based MR elastography of the human breast. *J Magn Reson Imaging.* 2003;17:72-85.
5. McKnight AL, Kugel JL, Rossman PJ, Manduca A, Hartmann LC, Ehman RL. MR elastography of breast cancer: preliminary results. *AJR Am J Roentgenol.* 2002;178:1411-1417.
6. Uffmann K, Maderwald S, Ajaj W, et al. In vivo elasticity measurements of extremity skeletal muscle with MR elastography. *NMR in Biomedicine.* 2004;17:181-190.
7. Matsumoto T, Abe H, Ohashi T, Kato Y, Sato M. Local elastic modulus of atherosclerotic lesions of rabbit thoracic aortas measured by pipette aspiration method. *Physiol Meas.* 2002;23:635-648.
8. Tay BK, Kim J, Srinivasan MA. In vivo mechanical behavior of intra-abdominal organs. *IEEE Trans Biomed Eng.* 2006;53:2129-2138.
9. Pajerowski JD, Dahl KN, Zhong FL, Sammak PJ, Discher DE. Physical plasticity of the nucleus in stem cell differentiation. *Proc Natl Acad Sci USA.* 2007;104:15619-15624.
